# Supplementary material
Source: PubMed Central journal article supplement (PMC11072445)
Supplement: 18_2024_5114_MOESM5_ESM.pdf [file 18_2024_5114_MOESM5_ESM.pdf]

| Species | Gene Name      | Forward primer           |
|---------|----------------|--------------------------|
| Mouse   | KIF18A         | ATCTGGGAAAACCTCACACAATGC |
| Mouse   | $\beta$ -actin | GGCTGTATTCCCCTCCATCG     |
| Mouse   | STAT1          | TCACAGTGGTTCGAGCTTCAG    |
| Mouse   | Col1A1         | GCTCCTCTTAGGGGCCACT      |
| Mouse   | Timp1          | CGAGACCACCTTATACCAGCG    |
| Mouse   | Tgf $\beta$ 1  | CCACCTGCAAGACCATCGAC     |
| Mouse   | YY1            | GTGGTTGAAGAGCAGATCATTGG  |
| Human   | YY1            | ACGGCTTCGAGGATCAGATTC    |

Reverse primer

GGCAGTGCTACACTCTTTCTCT  
CCAGTTGGTAACAATGCCATGT  
CGAGACATCATAGGCAGCGTG  
ATTGGGGACCCTTAGGCCAT  
ATGACTGGGGTGTAGGCGTA  
CTGGCGAGCCTTAGTTTGGAC  
TTGCTTAGGGTCTGAGAGGTC  
TGACCAGCGTTTGTCAATGT
