# Supplementary material
Source: PubMed Central journal article supplement (PMC11072445)
Supplement: 18_2024_5114_MOESM6_ESM.pdf [file 18_2024_5114_MOESM6_ESM.pdf]

| <b>Antibody name</b>                            | <b>Cat No.</b> | <b>Product no.</b>        | <b>Ratio of concentration</b> |
|-------------------------------------------------|----------------|---------------------------|-------------------------------|
| PI 3 Kinase p85 beta                            | ab313427       | abcam                     | 1:1000                        |
| phospho- PI 3 Kinase p85 alpha (phospho Y607)   | ab182651       | abcam                     | 1:500                         |
| Phospho-Akt (Ser473) (D9E) XP® Rabbit mAb #4060 | #4060          | cell signaling Technology | 20µg for IP;1:2000 for WB     |
| PI3 Kinase p110 gamma (D55D5) Rabbit mAb        | #5405          | cell signaling Technology | 1:1000                        |
| PI3 Kinase p110 alpha (C73F8) Rabbit mAb        | #4249          | cell signaling Technology | 1:1000                        |
| Phospho-PI3 Kinase p85 (Tyr458)/p55 (Tyr199)    | #17366         | cell signaling Technology | 1:1000                        |
| COL1A1 (E8F4L)                                  | #72026         | cell signaling Technology | 1:1000                        |
| TIMP1 (E1Y1U)                                   | #63363         | cell signaling Technology | 1:1000                        |
| PI3 Kinase p85 Alpha Monoclonal antibody        | 60225-1-Ig     | Proteintech               | 1:2000                        |
| PI3 Kinase p110 Beta Polyclonal antibody        | 20584-1-AP     | Proteintech               | 1:1000                        |
| KIF18A Polyclonal antibody                      | 19245-1-AP     | Proteintech               | 2µg for IP;1:2000 for WB      |
| Beta Actin Polyclonal antibody                  | 20536-1-AP     | Proteintech               | 1:2000                        |
| STAT1 Polyclonal antibody                       | 10144-2-AP     | Proteintech               | 1:5000                        |
| mTOR Monoclonal antibody                        | 66888-1-Ig     | Proteintech               | 1:5000                        |
| Phospho-mTOR (Ser2448) Monoclonal antibody      | 67778-1-Ig     | Proteintech               | 1:3000                        |
| YY1 Monoclonal antibody                         | 66281-1-Ig     | Proteintech               | 2µg for ChIP; 1:10000 for WB  |
| HA tag Polyclonal antibody                      | 51064-2-AP     | Proteintech               | 2µg for ChIP; 1:2000 for WB   |
| Flag tag Monoclonal antibody                    | 66008-4-Ig     | Proteintech               | 2µg for ChIP; 1:10000 for WB  |
| His-Tag Monoclonal antibody                     | 66005-1-Ig     | Proteintech               | 2µg for ChIP; 1:10000 for WB  |
| Mouse IgG                                       | B900620        | Proteintech               | 2µg for ChIP                  |
| Rabbit IgG                                      | B900610        | Proteintech               | 2µg for ChIP                  |
| PI3K p55 gamma Antibody                         | MA5-31995      | ThermoFisher              | 1:500                         |

|                                       |           |              |        |
|---------------------------------------|-----------|--------------|--------|
| PIK3R2 (P85 beta) Polyclonal Antibody | PA5-84807 | ThermoFisher | 1:3000 |
| phospho-PI3 Kinase p110 beta(Ser1070) | BS-6417R  | ThermoFisher | 1:200  |
