# Supplementary material
Source: PubMed Central journal article supplement (PMC11072445)
Supplement: 18_2024_5114_MOESM7_ESM.pdf [file 18_2024_5114_MOESM7_ESM.pdf]

| Species | Gene Name | Forward primer          | Reverse primer            |
|---------|-----------|-------------------------|---------------------------|
| Human   | Primer 1  | TCTTCACCAATGATCCATGCAA  | TCAGAATTGAGTCATTTGTCTCTGA |
| Human   | Primer 2  | ATTACCTACGTCTCATGGGCTG  | ATTTGTGTGCTGCTGGTCTTG     |
| Human   | Primer 3  | CGTATTTCCGATTTGTTCCAGGT | ACATTCTCTGTCTAATGATGGCA   |
