# Supplementary material
Source: PubMed Central journal article supplement (PMC11072445)
Supplement: 18_2024_5114_MOESM8_ESM.pdf [file 18_2024_5114_MOESM8_ESM.pdf]

| Accession | Gene    | Protein                                               | Description                                                                                              | Mw(kDa) | Length | Peptides |
|-----------|---------|-------------------------------------------------------|----------------------------------------------------------------------------------------------------------|---------|--------|----------|
| Q96EK5    | KBP     | KIF-binding protein                                   | KIF-binding protein OS=Homo sapiens OX=9606<br>GN=KBP PE=1 SV=3                                          | 71.814  | 621    | 10       |
| Q9UJX5    | APC4    | Anaphase-promoting complex                            | Anaphase-promoting complex subunit 4 OS=Homo                                                             | 92.116  | 808    | 7        |
| F8W881    | FAM120C | Constitutive coactivator of PPAR-gamma-like protein 2 | Constitutive coactivator of PPAR-gamma-like protein 2<br>OS=Homo sapiens OX=9606 GN=FAM120C PE=1<br>SV=2 | 99.352  | 895    | 6        |
| P62136    | PP1A    | Serine/threonine-protein phosphatase PP1-alpha        | Serine/threonine-protein phosphatase PP1-alpha                                                           | 37.512  | 330    | 5        |
| Q13042    | CDC16   | Cell division cycle protein 16 homolog                | Cell division cycle protein 16 homolog OS=Homo<br>sapiens OX=9606 GN=CDC16 PE=1 SV=1                     | 71.656  | 620    | 5        |
| P53804    | TTC3    | E3 ubiquitin-protein ligase TTC3                      | E3 ubiquitin-protein ligase TTC3 OS=Homo sapiens                                                         | 229.869 | 2025   | 5        |
| Q9H2P0    | ADNP    | Activity-dependent neuroprotector                     | Activity-dependent neuroprotector homeobox protein                                                       | 123.563 | 1102   | 5        |
| Q01082    | SPTBN1  | Spectrin beta chain, non-erythrocytic 1               | Spectrin beta chain, non-erythrocytic 1 OS=Homo<br>sapiens OX=9606 GN=SPTBN1 PE=1 SV=2                   | 274.609 | 2364   | 4        |
| P62807    | H2B1C   | Histone H2B type 1-C/E/F/G/I                          | Histone H2B type 1-C/E/F/G/I OS=Homo sapiens<br>OX=9606 GN=H2B1C PE=1 SV=1                               | 13.906  | 126    | 3        |
| B2RXH8    | HNRC2   | Heterogeneous nuclear ribonucleoprotein C-like 2      | Heterogeneous nuclear ribonucleoprotein C-like 2<br>OS=Homo sapiens OX=9606 GN=HNRC2 PE=3 SV=1           | 32.072  | 293    | 3        |
| Q9UMF0    | ICAM5   | Intercellular adhesion molecule 5                     | Intercellular adhesion molecule 5 OS=Homo sapiens                                                        | 97.116  | 924    | 3        |
| Q8WUP2    | FBLI1   | Filamin-binding LIM protein 1                         | Filamin-binding LIM protein 1 OS=Homo sapiens<br>OX=9606 GN=FBLI1 PE=1 SV=1                              | 40.67   | 373    | 3        |
| P29590    | PML     | Protein PML                                           | Protein PML OS=Homo sapiens OX=9606 GN=PML                                                               | 97.551  | 882    | 2        |
| P46013    | KI67    | Proliferation marker protein Ki-67                    | Proliferation marker protein Ki-67 OS=Homo sapiens                                                       | 358.694 | 3256   | 2        |
| Q12834    | CDC20   | Cell division cycle protein 20 homolog                | Cell division cycle protein 20 homolog OS=Homo<br>sapiens OX=9606 GN=CDC20 PE=1 SV=3                     | 54.723  | 499    | 2        |
| Q8NFT6    | DBF4B   | Protein DBF4 homolog B                                | Protein DBF4 homolog B OS=Homo sapiens OX=9606                                                           | 67.243  | 615    | 2        |
| Q96AY2    | EME1    | Crossover junction endonuclease EME1                  | Crossover junction endonuclease EME1 OS=Homo<br>sapiens OX=9606 GN=EME1 PE=1 SV=3                        | 63.252  | 570    | 2        |
| Q15653    | IKBB    | NF-kappa-B inhibitor beta                             | NF-kappa-B inhibitor beta OS=Homo sapiens OX=9606                                                        | 37.771  | 356    | 2        |
| Q16821    | PPR3A   | Protein phosphatase 1 regulatory subunit 3A           | Protein phosphatase 1 regulatory subunit 3A OS=Homo<br>sapiens OX=9606 GN=PPR3A PE=1 SV=1                | 125.767 | 1122   | 2        |
| P25788    | PSA3    | Proteasome subunit alpha type-3                       | Proteasome subunit alpha type-3 OS=Homo sapiens                                                          | 28.433  | 255    | 2        |
| Q9NYU2    | UGGG1   | UDP-glucose:glycoprotein                              | UDP-glucose:glycoprotein glucosyltransferase 1                                                           | 177.19  | 1555   | 2        |
| Q9H444    | CHM4B   | Charged multivesicular body protein 4b                | Charged multivesicular body protein 4b OS=Homo<br>sapiens OX=9606 GN=CHM4B PE=1 SV=2                     | 24.95   | 224    | 2        |

|        |          |                                                                  |                                                                                          |         |      |   |
|--------|----------|------------------------------------------------------------------|------------------------------------------------------------------------------------------|---------|------|---|
| Q8NI36 | WDR36    | WD repeat-containing protein 36                                  | WD repeat-containing protein 36 OS=Homo sapiens                                          | 105.322 | 951  | 2 |
| P25787 | PSMA2    | Proteasome subunit alpha type-2                                  | Proteasome subunit alpha type-2 OS=Homo sapiens                                          | 25.899  | 234  | 2 |
| P52597 | HNRNPF   | Heterogeneous nuclear                                            | Heterogeneous nuclear ribonucleoprotein F OS=Homo                                        | 45.672  | 415  | 2 |
| P46776 | RPL27A   | Large ribosomal subunit protein uL15                             | 60S ribosomal protein L27a OS=Homo sapiens                                               | 16.561  | 148  | 2 |
| P14618 | PKM      | pyruvate kinase M1/2                                             | pyruvate kinase M1/2 OS=Homo sapiens OX=9606                                             | 57.937  | 531  | 1 |
| Q15185 | PTGES3   | Prostaglandin E synthase 3                                       | Prostaglandin E synthase 3 OS=Homo sapiens                                               | 18.697  | 160  | 1 |
| Q9UJX2 | CDC23    | Cell division cycle protein 23                                   | Cell division cycle protein 23 homolog OS=Homo                                           | 68.834  | 597  | 1 |
| P55060 | XPO2     | Exportin-2                                                       | Exportin-2 OS=Homo sapiens OX=9606 GN=XPO2                                               | 110.417 | 971  | 1 |
| P49720 | PSB3     | Proteasome subunit beta type-3                                   | Proteasome subunit beta type-3 OS=Homo sapiens                                           | 22.949  | 205  | 1 |
| P0D092 | CDIPTOSP | CDIP transferase opposite strand, pseudogene                     | Putative protein T-ENOL OS=Homo sapiens OX=9606                                          | 9.002   | 83   | 1 |
| Q8IY92 | SLX4     | SLX4 structure-specific                                          | GN=CDIPTOSP PE=4 SV=1<br>SLX4 structure-specific endonuclease subunit                    | 200.012 | 1834 | 1 |
| Q8TDY2 | RB1CC1   | RB1-inducible coiled-coil protein 1                              | RB1-inducible coiled-coil protein 1 OS=Homo sapiens                                      | 183.091 | 1594 | 1 |
| Q9UL42 | PNMA2    | Paraneoplastic antigen Ma2                                       | OX=9606 GN=RB1CC1 PE=1 SV=1<br>PNMA family member 2 OS=Homo sapiens OX=9606              | 41.509  | 364  | 1 |
| P30519 | HMOX2    | Heme oxygenase 2                                                 | Heme oxygenase 2 OS=Homo sapiens OX=9606                                                 | 36.033  | 316  | 1 |
| Q86UK0 | ABCA12   | Glucosylceramide transporter                                     | GN=HMOX2 PE=1 SV=3<br>ATP-binding cassette sub-family A member 12                        | 293.237 | 2595 | 1 |
| O15178 | TBXT     | T-box transcription factor T                                     | T-box transcription factor T OS=Homo sapiens                                             | 47.443  | 435  | 1 |
| P38398 | BRCA1    | Breast cancer type 1 susceptibility                              | OX=9606 GN=TBXT PE=1 SV=3<br>Breast cancer type 1 susceptibility protein OS=Homo         | 207.721 | 1863 | 1 |
| P62244 | RPS15A   | Small ribosomal subunit protein uS8                              | Small ribosomal subunit protein uS8 OS=Homo sapiens                                      | 14.840  | 130  | 1 |
| O75376 | NCOR1    | Nuclear receptor corepressor 1                                   | OX=9606 GN=RPS15A PE=1 SV=2<br>Nuclear receptor corepressor 1 OS=Homo sapiens            | 270.210 | 2440 | 1 |
| Q32NC0 | CR021    | UPF0711 protein C18orf21                                         | UPF0711 protein C18orf21 OS=Homo sapiens                                                 | 24.827  | 220  | 1 |
| P36873 | PP1G     | Serine/threonine-protein phosphatase PP1-gamma catalytic subunit | Serine/threonine-protein phosphatase PP1-gamma catalytic subunit OS=Homo sapiens OX=9606 | 36.984  | 323  | 1 |
| Q5VSY0 | GKAP1    | G kinase-anchoring protein 1                                     | GN=PP1G PE=1 SV=1<br>G kinase-anchoring protein 1 OS=Homo sapiens                        | 42.078  | 366  | 1 |
| P28066 | PSA5     | Proteasome subunit alpha type-5                                  | OX=9606 GN=GKAP1 PE=2 SV=1<br>Proteasome subunit alpha type-5 OS=Homo sapiens            | 26.411  | 241  | 1 |

|        |       |                                |                                                                                           |        |     |   |
|--------|-------|--------------------------------|-------------------------------------------------------------------------------------------|--------|-----|---|
| P25815 | S100P | Protein S100-P                 | Protein S100-P OS=Homo sapiens OX=9606<br>GN=S100P PE=1 SV=1                              | 10.400 | 95  | 1 |
| P30260 | CDC27 | Cell division cycle protein 27 | Cell division cycle protein 27 homolog OS=Homo<br>nucleophosmin 1 OS=Homo sapiens OX=9606 | 91.867 | 824 | 1 |
| P06748 | NPM1  | Nucleophosmin-1                | GN=NPM1 PE=1 SV=2                                                                         | 32.575 | 294 | 1 |
